# Supplementary material for: Bacillus Classification Based on Matrix-Assisted Laser Desorption Ionization Time-of-Flight Mass Spectrometry—Effects of Culture Conditions
Source: PubMed Central journal article supplement (PMC5686160; doi:10.1038/s41598-017-15808-5), 2017-11-14
Supplement: 41598_2017_15808_MOESM1_ESM.pdf [file 41598_2017_15808_MOESM1_ESM.pdf]

## Supplementary information

### ***Bacillus* Classification Based on Matrix-Assisted Laser Desorption Ionization Time-of-Flight Mass Spectrometry—Effects of Culture Conditions**

Lin-Jie Shu and Yu-Liang Yang\*

Agricultural Biotechnology Research Center, Academia Sinica, Taipei 11529, Taiwan

\*Correspondence

Yu-Liang Yang: [ylyang@gate.sinica.edu.tw](mailto:ylyang@gate.sinica.edu.tw)

## Table of Contents

---

|           |                                                                                                                                                                                                                                     |      |
|-----------|-------------------------------------------------------------------------------------------------------------------------------------------------------------------------------------------------------------------------------------|------|
| Figure S1 | The colony morphology of <i>B. vallismortis</i> SFY-3S and <i>B. vallismortis</i> SFY-3W.                                                                                                                                           | 3    |
| Table S1  | The proportion of <i>Bacillus</i> endospore cell formation (vegetative cells/total cells) after 12, 24, 48, and 72 hours post incubation.                                                                                           | 4    |
| Figure S2 | The micrographs of (a) <i>B. marisflavi</i> DSM 16204 and (b) <i>B. vallismortis</i> DSM 11031 incubated for 12 hours, 24 hours, 48 hours and 72 hours stained by Schaeffer-Fulton spore staining.                                  | 5    |
| Figure S3 | MSP dendrograms and spectral gel view of (a) <i>B. cereus</i> and (b) <i>B. subtilis</i> group species cultured for 12, 24, 48, 72 hours.                                                                                           | 6    |
| Figure S4 | Three- and two-dimensional principal component analysis plots of <i>B. cereus</i> group, <i>B. subtilis</i> group, <i>B. megaterium</i> , <i>B. marisflavi</i> and other <i>Bacillus</i> species cultured for 12, 24, 48, 72 hours. | 7    |
| Figure S5 | MSP dendrograms and gel-views of (a) <i>B. cereus</i> DSM 31 (b) <i>B. subtilis</i> DSM10 cultured for 12, 24, 48, 72 hours.                                                                                                        | 8    |
| Figure S6 | Biotyper analysis of <i>Bacillus</i> with different culture media.                                                                                                                                                                  | 9-12 |

(a)

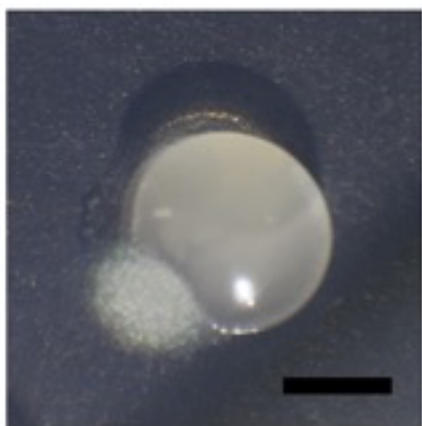

(b)

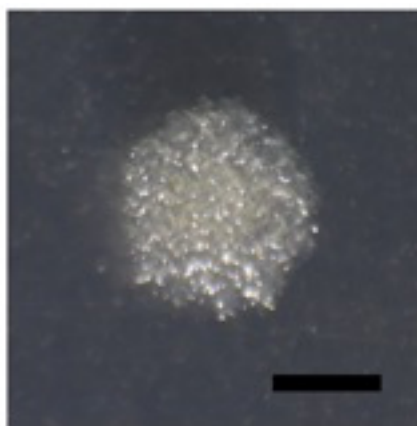

**Figure S1. The colony morphology of (a) *B. vallismortis* SFY-3S and (b) *B. vallismortis* SFY-3W at 30°C for 24 hours on LB agar. Scale bars represent 2 mm.**

**Table S1: The proportion of *Bacillus* endospore cell formation (vegetative cells/total cells) after 12, 24, 48, and 72 hours post incubation.**

| Species                                                 | Endospore Fractions (%) |         |         |         |
|---------------------------------------------------------|-------------------------|---------|---------|---------|
|                                                         | 12-hour                 | 24-hour | 48-hour | 72-hour |
| <i>B. thuringiensis</i> DSM 2046                        | 0                       | 0       | 0       | 0       |
| <i>B. mycooides</i> DSM 2048                            | 0                       | 0       | 0       | 0       |
| <i>B. subtilis</i> subsp. <i>subtilis</i> DSM 10        | 0                       | 0.47    | 0.63    | 0.61    |
| <i>B. amyloliquefaciens</i> DSM 7                       | 0                       | 0       | 10.00   | 41.33   |
| <i>B. cereus</i> DSM 31                                 | 0                       | 0       | 0       | 0.33    |
| <i>B. vallismortis</i> DSM 11031                        | *                       | *       | *       | *       |
| <i>B. marisflavi</i> DSM 16204                          | *                       | *       | *       | *       |
| <i>B. cereus</i> 31                                     | 0                       | 0.50    | 0.36    | 0.17    |
| <i>B. cereus</i> 17                                     | 0                       | 0       | 0.01    | 0.05    |
| <i>B. cereus</i> 16                                     | 0                       | 0       | 0       | 0.01    |
| <i>B. thuringiensis</i> subsp. <i>kurstaki</i> ABTS-351 | 0                       | 0.01    | 0.50    | 0.11    |
| <i>B. thuringiensis</i> subsp. <i>aizawai</i> NB-200    | 0.1                     | 0.01    | 4.40    | 5.14    |
| <i>B. mycooides</i> sg5CY                               | 0                       | 0       | 0       | 0       |
| <i>B. subtilis</i> 376                                  | 0                       | 5       | 6.67    | 11.88   |
| <i>B. subtilis</i> No30                                 | 0                       | 0       | 0.16    | 0.14    |
| <i>B. subtilis</i> fgu5AM                               | 0                       | 0.01    | 10.00   | 35.71   |
| <i>B. vallismortis</i> SFY-3W                           | 0                       | 0.01    | 0.29    | 5.29    |
| <i>B. vallismortis</i> SFY-3S                           | 0                       | 0.17    | 10.61   | 37.5    |
| <i>B. amyloliquefaciens</i> 35                          | 0                       | 0.04    | 3.44    | 59.72   |
| <i>Bacillus</i> sp. CRLEF-1A                            | 0                       | 1       | 7.5     | 78.05   |
| <i>Bacillus</i> sp. CRLEF-1B                            | 0                       | 1.15    | 67.14   | 65.15   |
| <i>Bacillus</i> sp. CRLEF-1C                            | 0                       | 0       | 33.33   | 97.96   |
| <i>Bacillus</i> sp. BPRB37-A                            | 0                       | 0.13    | 11.67   | 89.47   |
| <i>Bacillus</i> sp. BPRB37-C                            | 0.07                    | 0.91    | 6.07    | 95.56   |
| <i>B. licheniformis</i> sp5BS                           | 0                       | 0       | 0.21    | 1.69    |
| <i>B. megaterium</i> No56                               | 0                       | 0       | 0       | 0       |
| <i>B. megaterium</i> 42                                 | 0                       | 0       | 0       | 0       |
| <i>Bacillus</i> sp. fgu5FY                              | 0                       | 0       | 0.01    | 0.03    |
| <i>B. safensis</i> SC                                   | 0.08                    | 2.96    | 0.02    | 0.23    |
| <i>Bacillus</i> sp. UOY-1                               | 0                       | 0       | 0       | 0       |

\* *B. vallismortis* DSM 11031 and *B. marisflavi* DSM 16204 did not present a fit to this endospore measurement method, substituted by light microscopic observation (Figure S2).

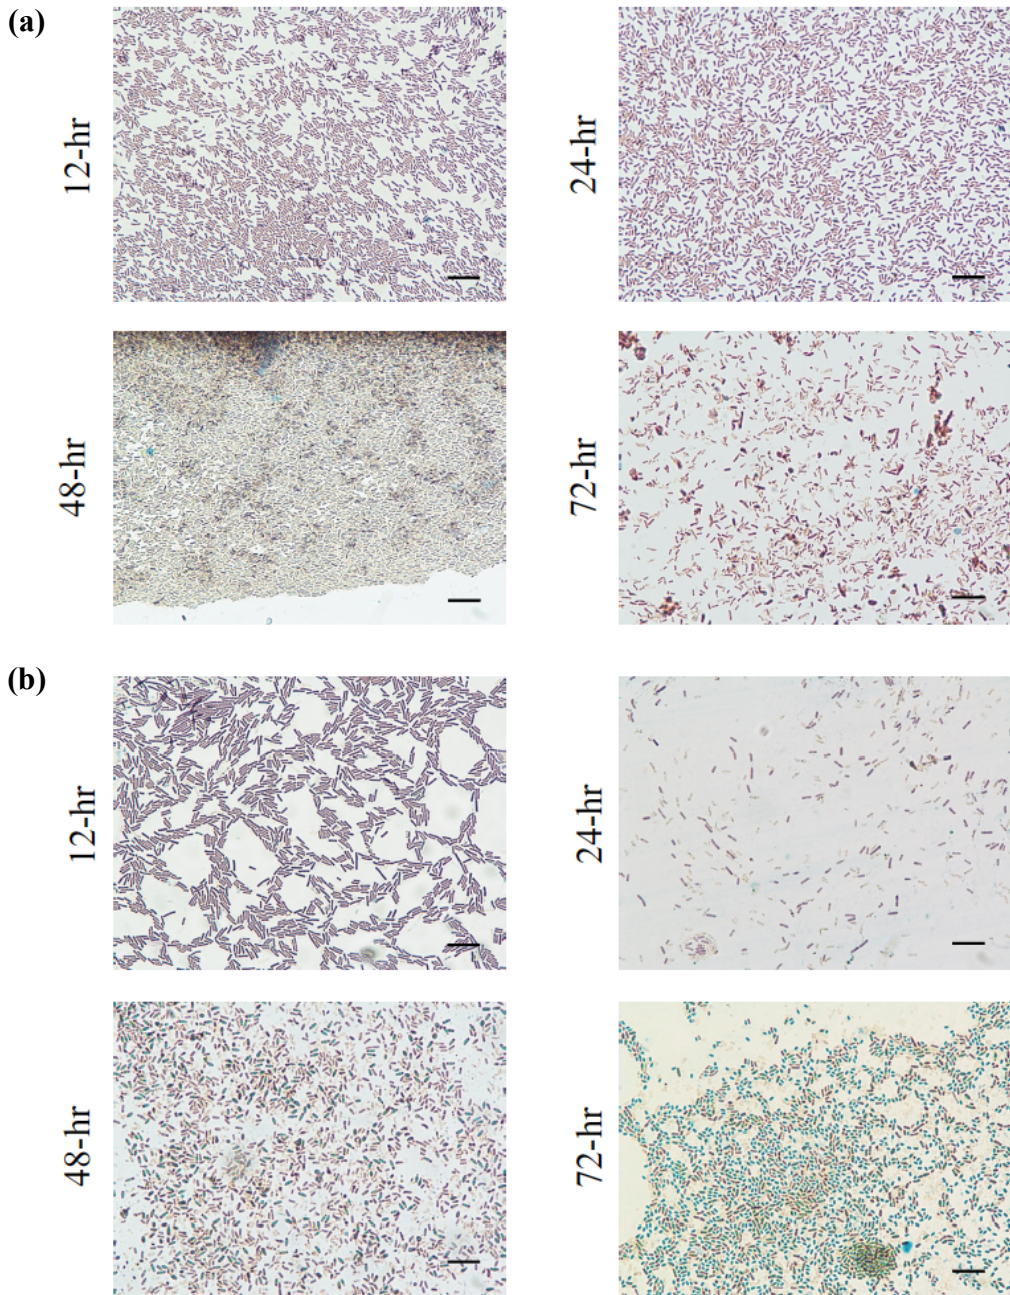

**Figure S2.** The micrographs of (a) *B. marisflavi* DSM 16204 and (b) *B. vallismortis* DSM 11031 incubated for 12 hours, 24 hours, 48 hours and 72 hours stained by Schaeffer-Fulton spore staining. They were cultured at 30°C on LB agar, and the samples were examined by Eclipse Ci-L microscope (Nikon) with eyepiece lens 10X, objective oil len 100X and software NIS Element D 4.5 (Nikon). Scale bars represent 10  $\mu\text{m}$ .

**(A)**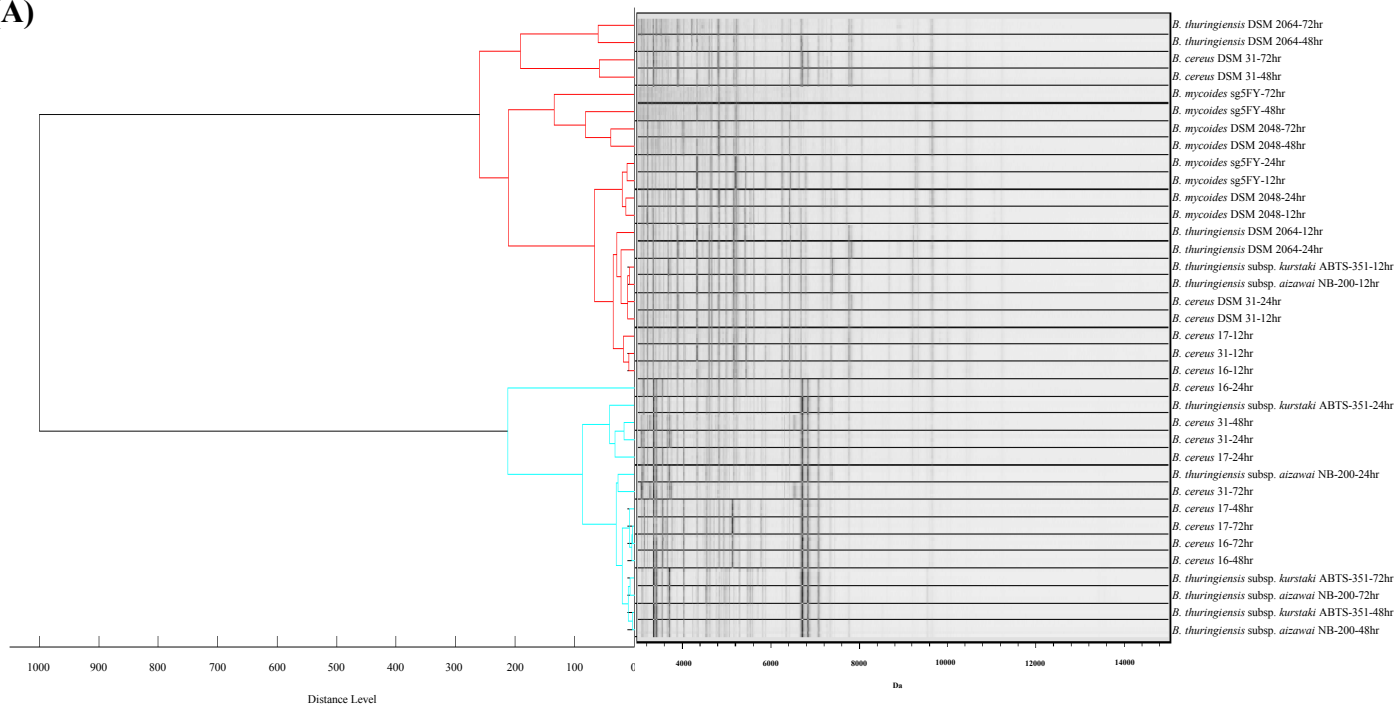**(B)**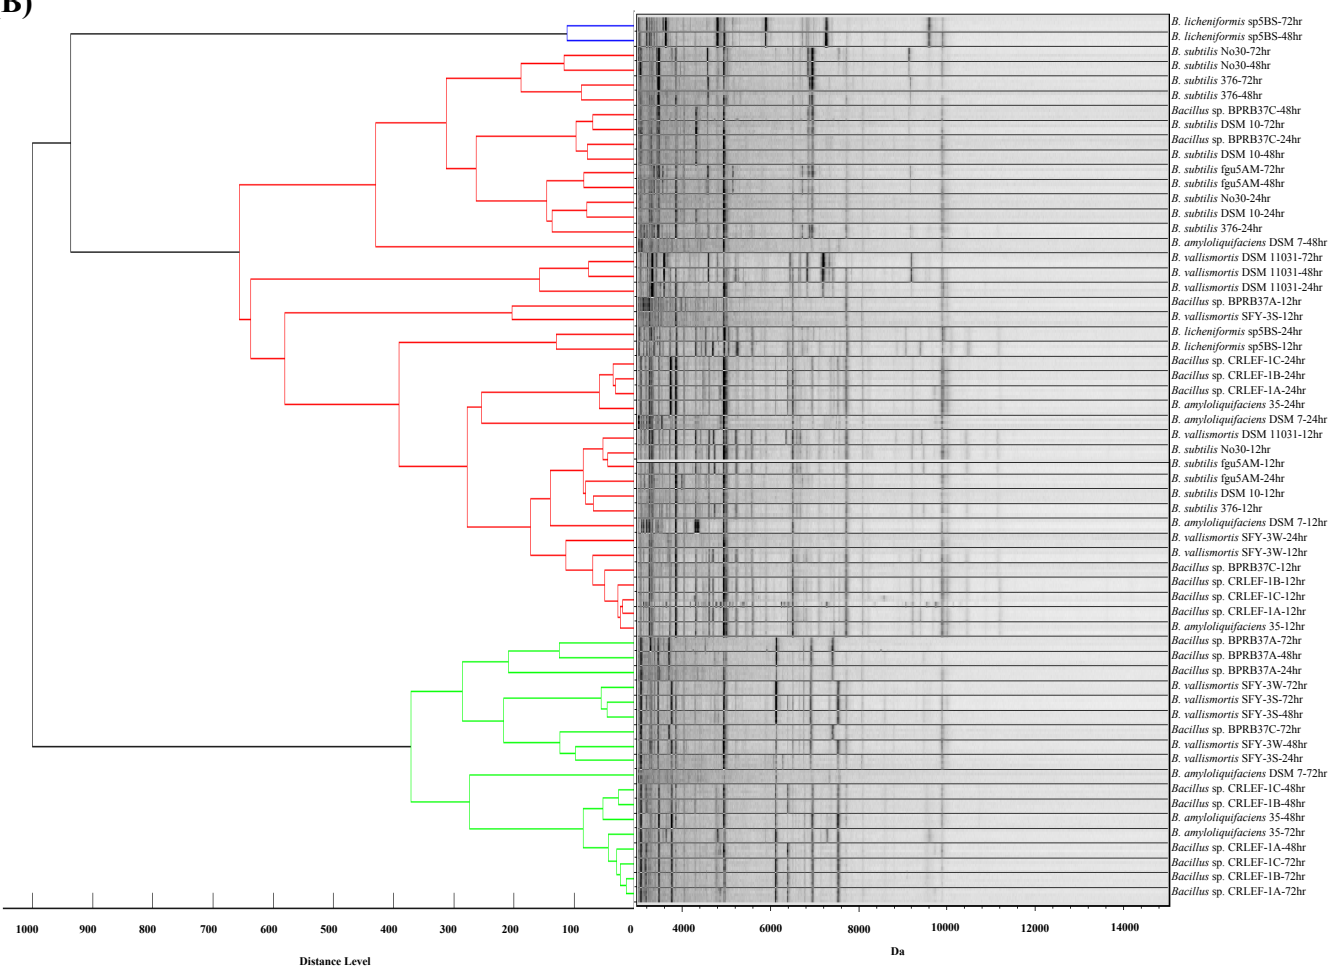

**Figure S3. MSP dendrograms and spectral gel view of (a) *B. cereus* and (b) *B. subtilis* group species cultured for 12, 24, 48, 72 hours. Numbers behind the species and strain name indicate growth time.**

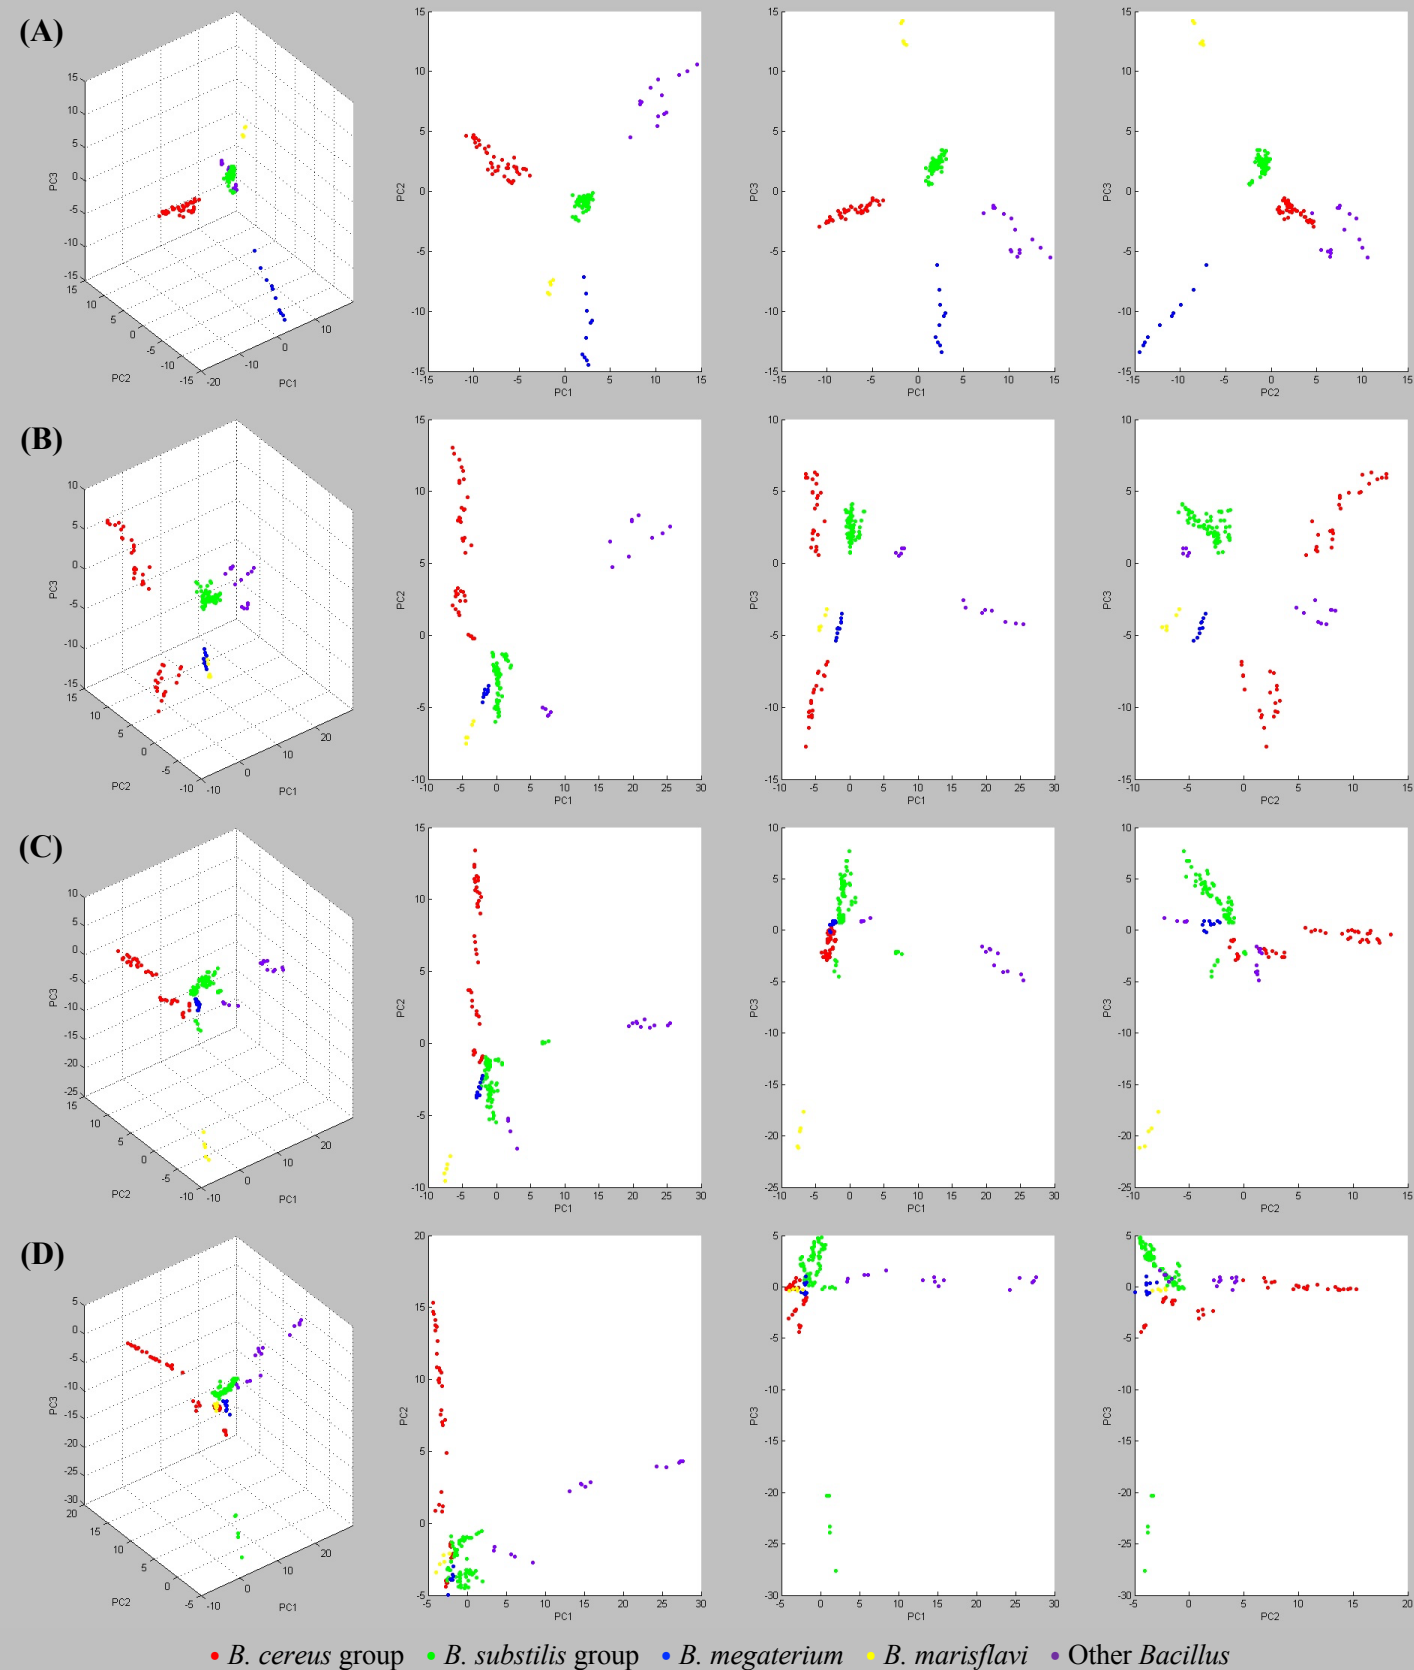

**Figure S4. Three- and two-dimensional principal component analysis plots of *B. cereus* group, *B. subtilis* group, *B. megaterium*, *B. marisflavi* and other *Bacillus* species cultured for (A) 12 hours, (B) 24 hours, (C) 48 hours, and (D) 72 hours. The spot presents one spectrum and each *Bacillus* isolate includes five spectra. The plots were generated by first three principal components: PC1, PC2, and PC3.**

## Endospore proportion

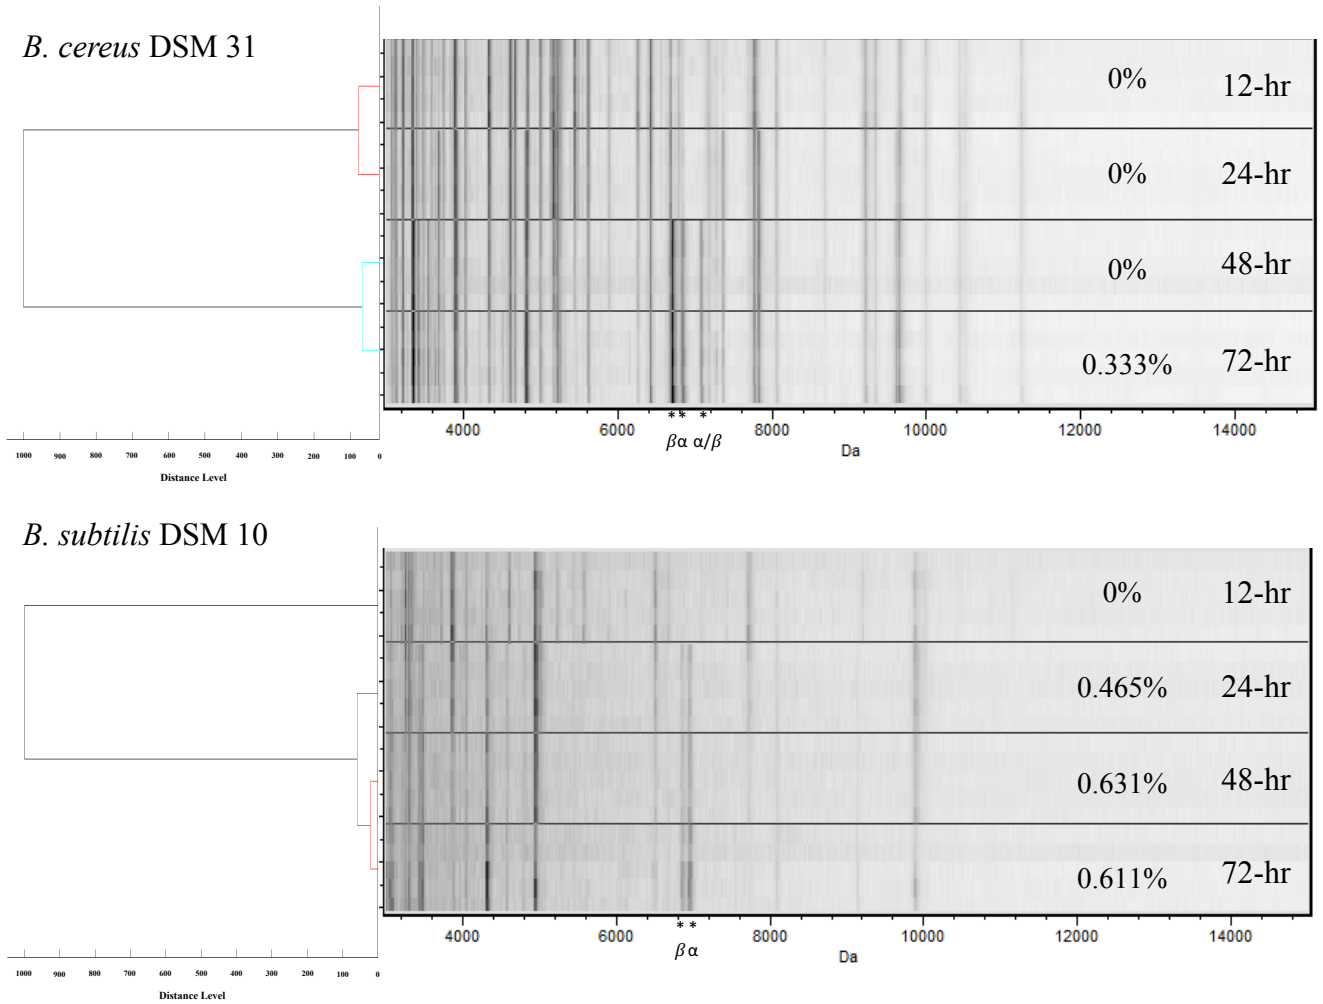

**Figure S5. MSP dendrograms and gel-views of (a) *B. cereus* DSM 31 (b) *B. subtilis* DSM10 cultured for 12, 24, 48, 72 hours.** The peaks of small acid-soluble proteins (SASPs) are indicated by asterisks.  $\alpha$ ,  $\beta$ , and  $\alpha/\beta$  indicate the  $\alpha$ -SASP,  $\beta$ -SASP, and  $\alpha/\beta$ -SASP, respectively. Endospore proportions of samples are showed on the gel view, according to Table S1.



(a)

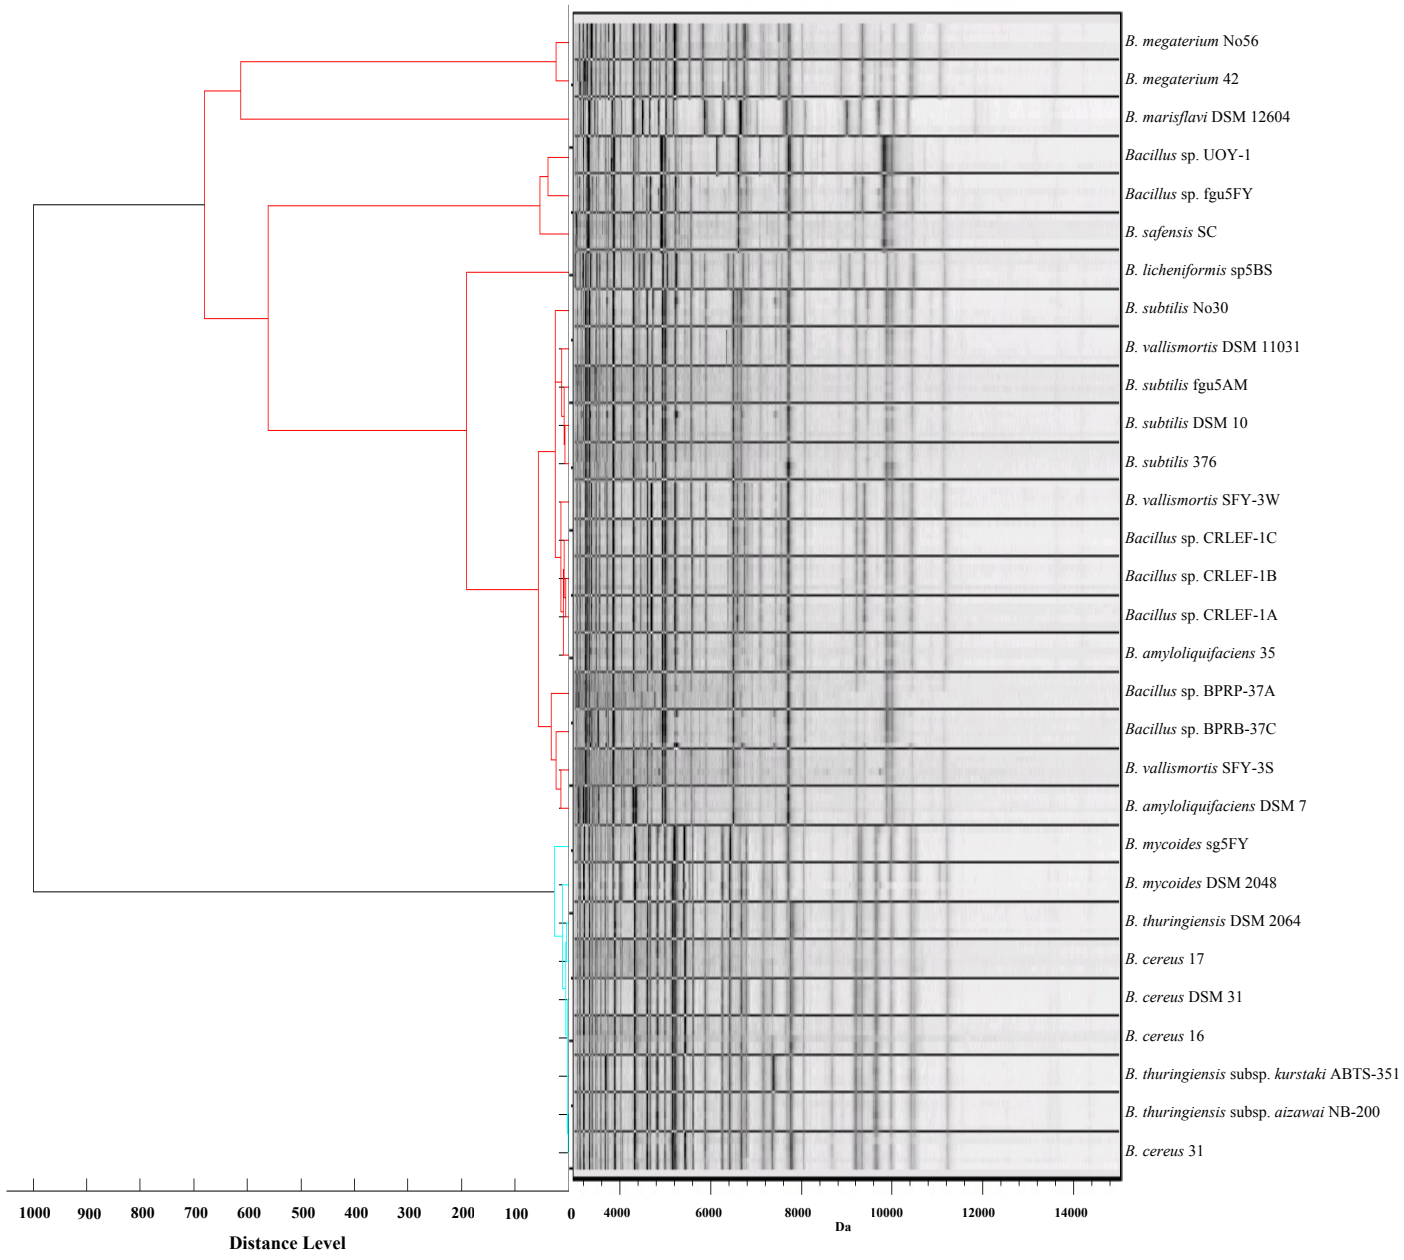

**Figure S6. Biotyper analysis of *Bacillus* with different culture media.** MSP dendrograms and spectral gel views of *Bacillus* cultured on (a) LB agar, (b) NA, (c) BHI agar and (d) PCA at 30°C for 12 hours. (Continued)

(b)

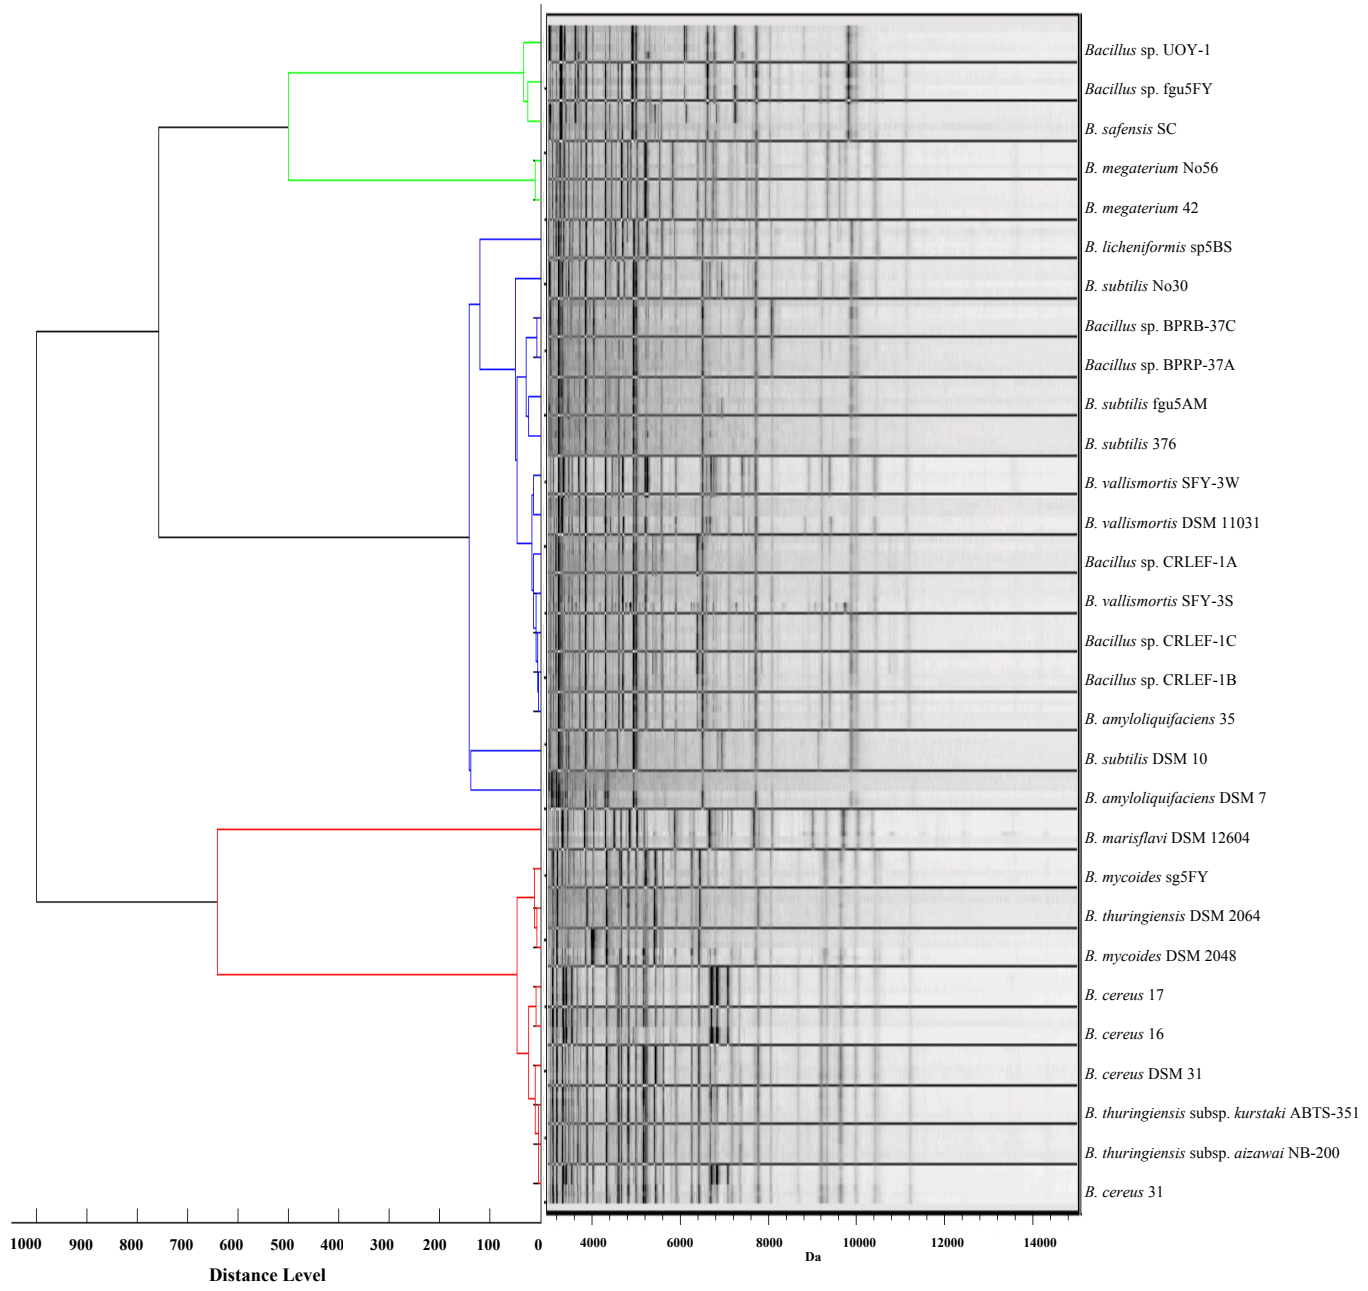

**Figure S6. (Continued) Biotyper analysis of *Bacillus* with different culture media.** MSP dendrograms and spectral gel views of *Bacillus* cultured on (a) LB agar, (b) NA, (c) BHI agar and (d) PCA at 30°C for 12 hours.

(c)

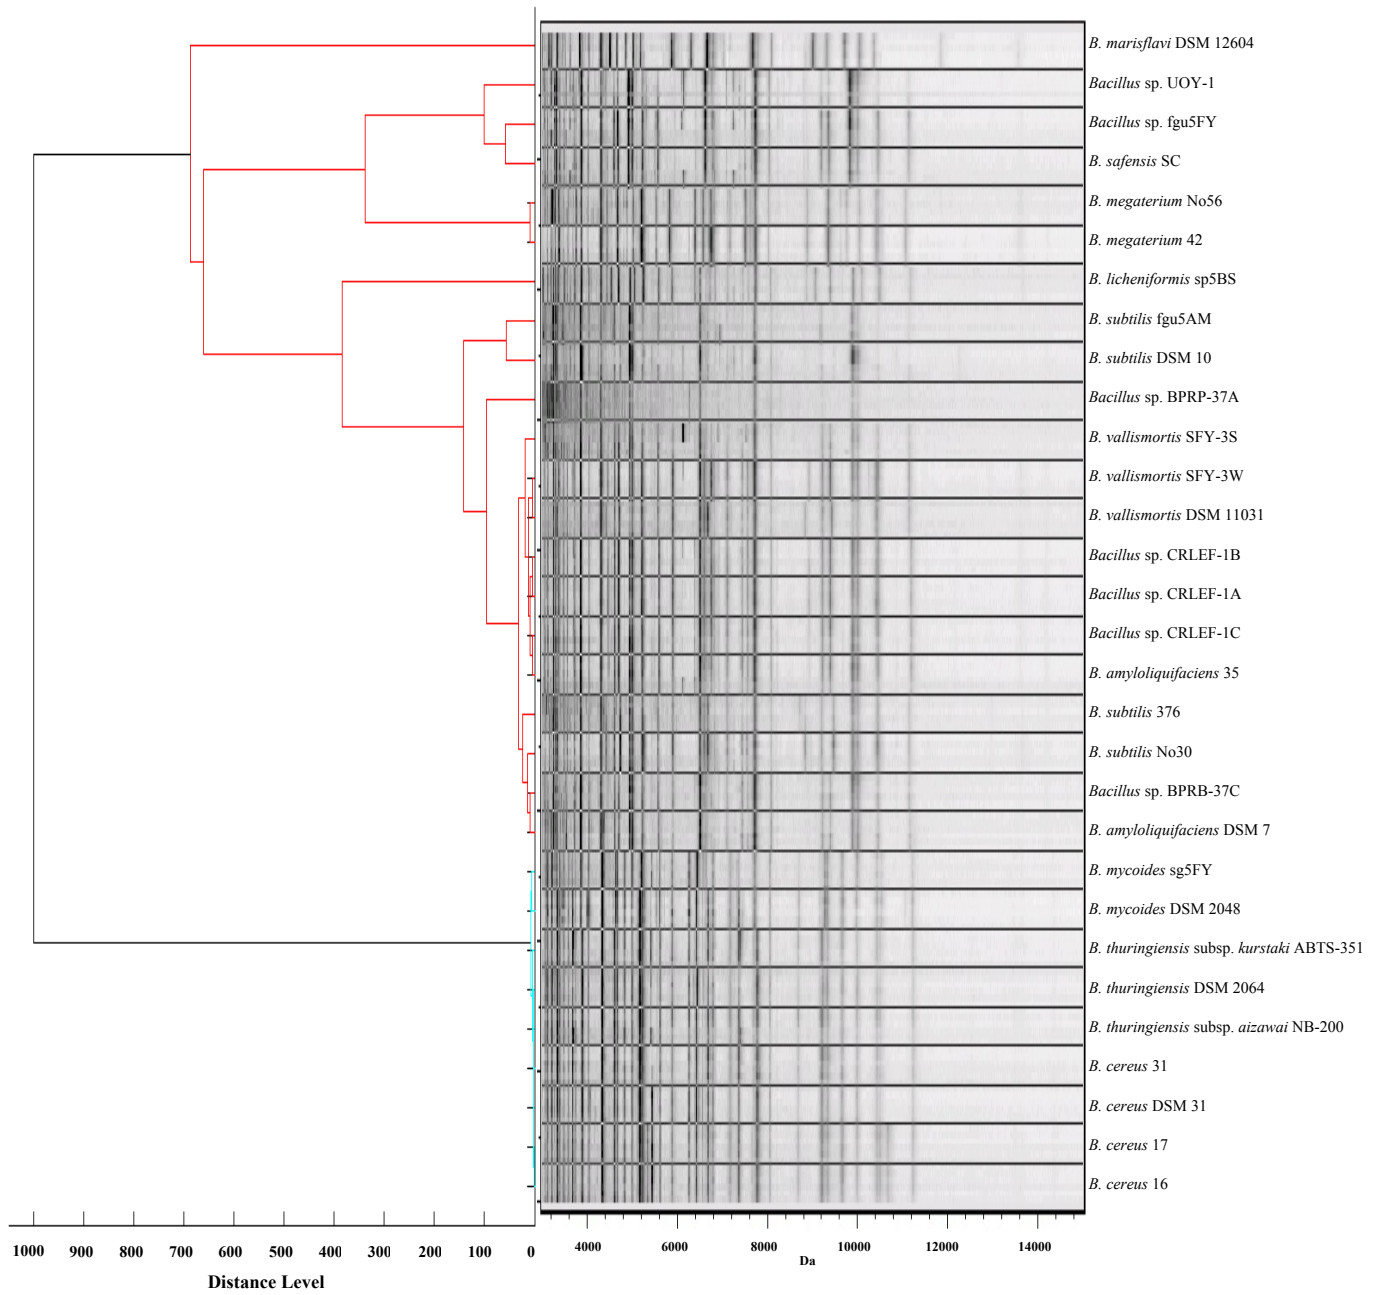

**Figure S6. (Continued) Biotyper analysis of *Bacillus* with different culture media.** MSP dendrograms and spectral gel views of *Bacillus* cultured on (a) LB agar, (b) NA, (c) BHI agar and (d) PCA at 30°C for 12 hours.

(d)

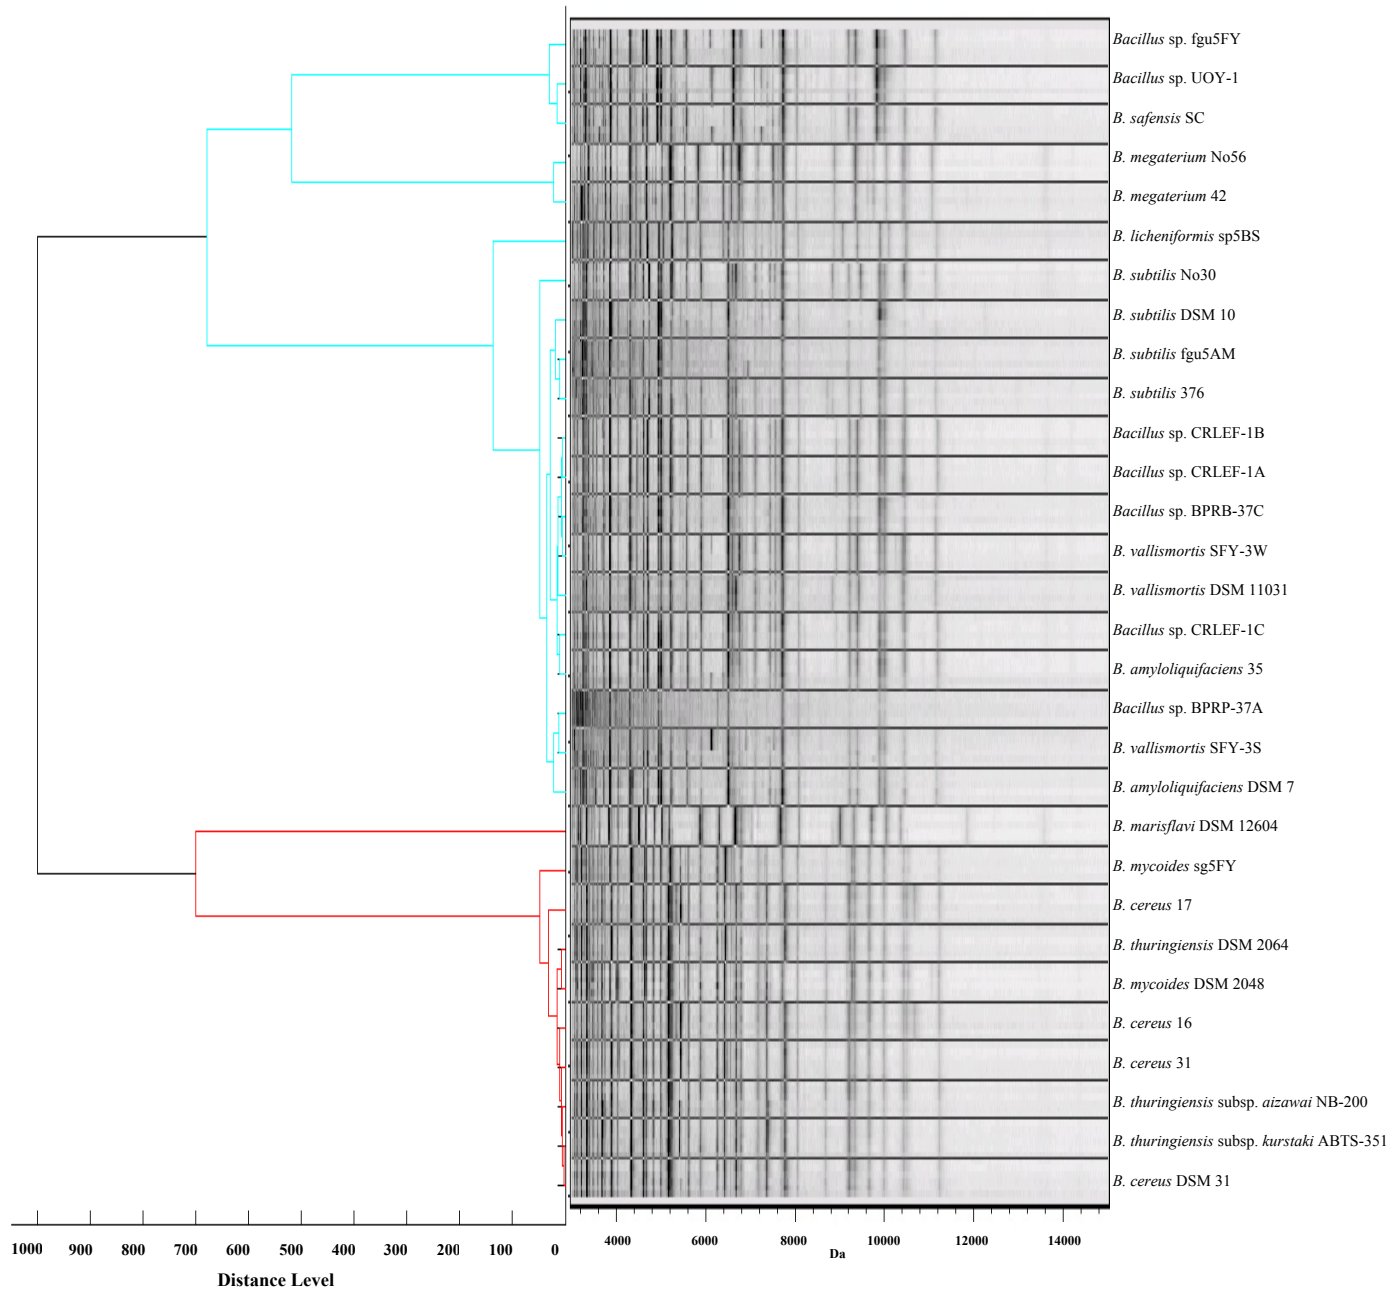

**Figure S6. (Continued) Biotyper analysis of *Bacillus* with different culture media.** MSP dendrograms and spectral gel views of *Bacillus* cultured on (a) LB agar, (b) NA, (c) BHI agar and (d) PCA at 30°C for 12 hours.
